# Supplementary material for: ABHD5 suppresses cancer cell anabolism through lipolysis-dependent activation of the AMPK/mTORC1 pathway
Source: PubMed Central journal article supplement (PMC7949079; doi:10.1074/jbc.ra120.014682), 2020-11-27
Supplement: mmc1.pdf [file mmc1.pdf]

## Supporting Information

### **ABHD5 suppresses cancer cell anabolism through lipolysis-dependent activation of the AMPK/mTORC1 pathway**

Guohua Chen<sup>1</sup>, Guoli Zhou<sup>2</sup>, Aaron Lotvola<sup>3</sup>, James G. Granneman<sup>4</sup> and Jian Wang<sup>1\*</sup>

<sup>1</sup>Department of Pathology, <sup>3</sup>Department of Oncology, and <sup>4</sup>Center for Molecular Medicine and Genetics, Wayne State University School of Medicine, Detroit, MI 48202, USA

<sup>2</sup> Biomedical Research Informatics Core, Clinical and Translational Sciences Institute, Michigan State University, East Lansing, MI 48824 USA

\*Corresponding author: Jian Wang  
Email: [jianwang@med.wayne.edu](mailto:jianwang@med.wayne.edu)

**Running title:** Lipolysis tunes down cancer anabolism

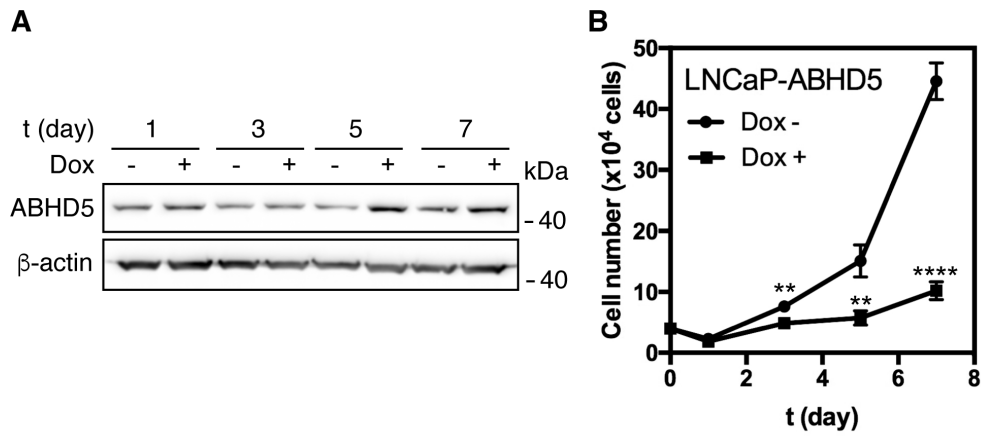

**Figure S1. Overexpression of ABHD5 inhibits the proliferation of LNCaP cells.**

- A. Western blotting for the levels of ABHD5 and  $\beta$ -actin in the LNCaP-ABHD5 cells with or without doxycycline treatment for the indicated time.
- B. Cell growth kinetics of the LNCaP-ABHD5 cells in the absence (circle) or presence (square) of doxycycline for up to 7 d. Data are presented as Mean  $\pm$  SD (n = 3). \*\*p<0.01, \*\*\*\*p<0.0001.

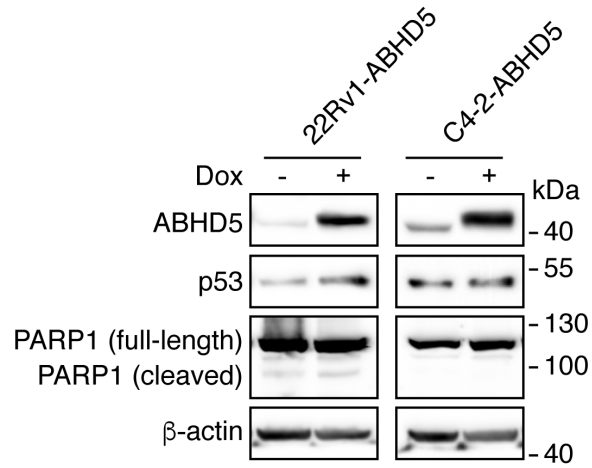

**Figure S2. Overexpression of ABHD5 modestly stimulates p53 expression but does not induce apoptosis.**

Western blotting to determine the levels of the indicated proteins in the 22Rv1-ABHD5 (left) and C4-2-ABHD5 (right) cells with or without doxycycline (Dox) treatment for 72 h.

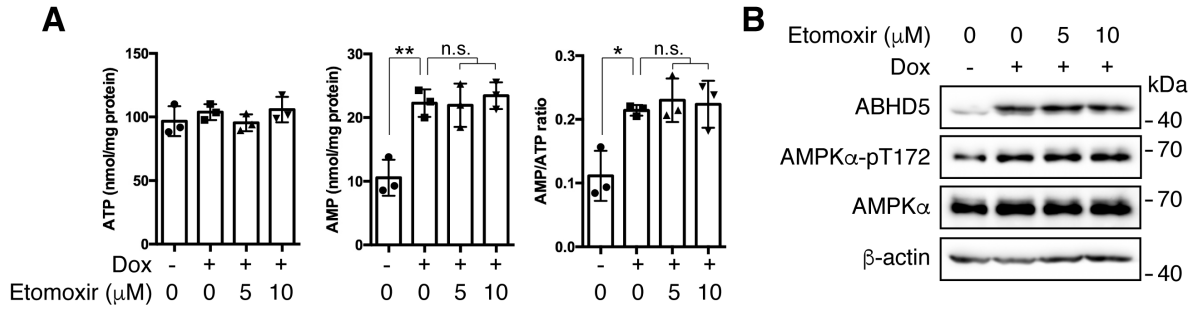

**Figure S3. Etomoxir does not prevent ABHD5 from activating AMPK in C4-2 cells.**

- A. Levels of AMP, ATP, and AMP/ATP ratio in the C4-2-ABHD5 cells treated as indicated for 24 h. Data are presented as Mean  $\pm$  SD (n = 3). \*p<0.05, \*\*p<0.01, n.s. not significant. Student t-test.
- B. Levels of the indicated proteins in the C4-2-ABHD5 cells treated as in A.

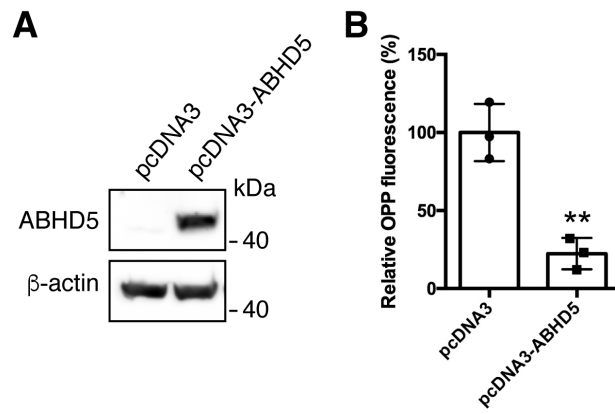

**Figure S4. Overexpression of ABHD5 inhibits the protein synthesis of human lung cancer H1299 cells.**

Levels of the indicated proteins (A) and relative new protein synthesis (B) in the H1299 cells that were stably transfected with pcDNA3 or pcDNA3-ABHD5 plasmid. Data are presented as Mean  $\pm$  SD (n = 3). \*\*p<0.01.
